# Supplementary material for: Two novel selenidostannates from mixed structure-directing systems: the large ten-membered ring of [Sn3Se4] semicubes and the 3D [Sn4Se9]n2n−with multi-channels
Source: Royal Society of Chemistry journal article supplement (doi:10.1039/c6dt01482h), 2016-01-01
Supplement: c6dt01482h1.pdf [file c6dt01482h1.pdf]

# Two novel selenidostannates from mixed structure-directing systems: The large ten-membered ring of [Sn<sub>3</sub>Se<sub>4</sub>] semicubes and the 3D [Sn<sub>4</sub>Se<sub>9</sub>]<sub>n</sub><sup>2n-</sup> with multi-channels

Cheng-Feng Du,<sup>a,b</sup> Nan-Nan Shen,<sup>a,b</sup> Jian-Rong Li,<sup>a</sup> Min-Ting Hao,<sup>a,c</sup> Zi Wang,<sup>d</sup> Chu-Chu Cheng<sup>d</sup> and Xiao-Ying Huang<sup>\*a</sup>

<sup>a</sup> State Key Laboratory of Structural Chemistry, Fujian Institute of Research on the Structure of Matter, Chinese Academy of Sciences, Fuzhou, Fujian 350002, P. R. China. Fax: (+86) 591-63173145

<sup>b</sup> University of Chinese Academy of Sciences, Beijing, 100049, P. R. China.

<sup>c</sup> College of Materials Science and Engineering, Fujian Normal University, Fuzhou, Fujian 350002, P. R. China.

<sup>d</sup> College of Chemistry, Fuzhou University, Fuzhou, Fujian 350116, P. R. China.

E-mail: [xyhuang@fjirsm.ac.cn](mailto:xyhuang@fjirsm.ac.cn)

## Supporting Information

### List of Contents

#### 1. More Structural details

**Figure S1.** Perspective view of the packing diagram of **1** showing the intensive hydrogen bonding interactions.

**Figure S2.** Perspective view of packing diagram of **2** showing the intensive hydrogen bonding interactions.

**Figure S3.** Linkages in 3D-[Fe(bipy)<sub>3</sub>]Sn<sub>4</sub>Se<sub>9</sub>·2H<sub>2</sub>O, 3D-(Bmmim)<sub>2</sub>[Ni(1,2-pda)<sub>3</sub>][Sn<sub>4</sub>Se<sub>9</sub>]<sub>2</sub> and 2D-[Sn<sub>4</sub>Se<sub>9</sub>]<sub>n</sub><sup>2n-</sup>.

**Tables S1-S2.** Supramolecular interactions for **1** and **2**.

#### 2. Physical measurements

**Figures S4-S5.** PXRD patterns of compounds **1** and **2**.

**Figures S6-S7.** PXRD patterns of the post-TGA residues of compounds **1** and **2**.

**Figures S8-S9.** EDX spectra of compounds **1** and **2**.

**Tables S3-S4.** Atomic percentages of compounds **1** and **2** from EDX analyses.

## 1. More Structural details

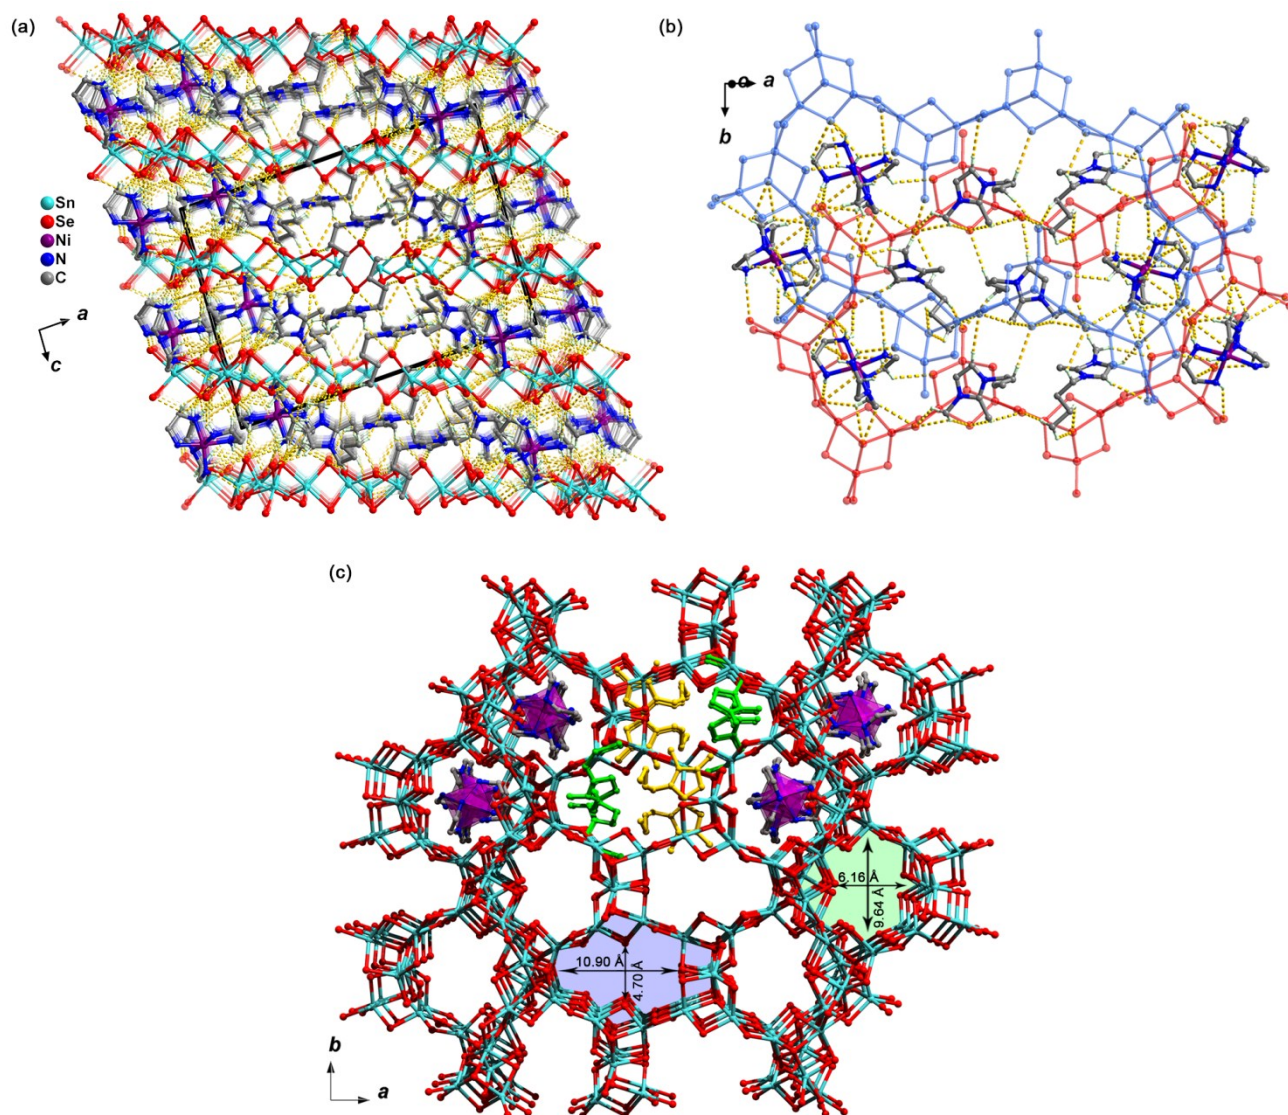

**Figure S1.** (a) Perspective views along the *b*-axis of the packing diagram of **1** showing the intensive hydrogen bonds among cations and anionic  $[\text{Sn}_3\text{Se}_7]_n^{2n-}$  layers. (b) Intensive hydrogen bonds for the cations between two adjacent anionic  $[\text{Sn}_3\text{Se}_7]_n^{2n-}$  layers of **1**. Some of the hydrogen atoms on MACs and  $[\text{Bmmim}]^+$  cations are omitted for clarity. (c) Stacking of  $[\text{Sn}_3\text{Se}_7]_n^{2n-}$  layers and the two different channels viewed along the *c*-axis (windows of the two kinds of channels are shaped in green and purple, respectively).

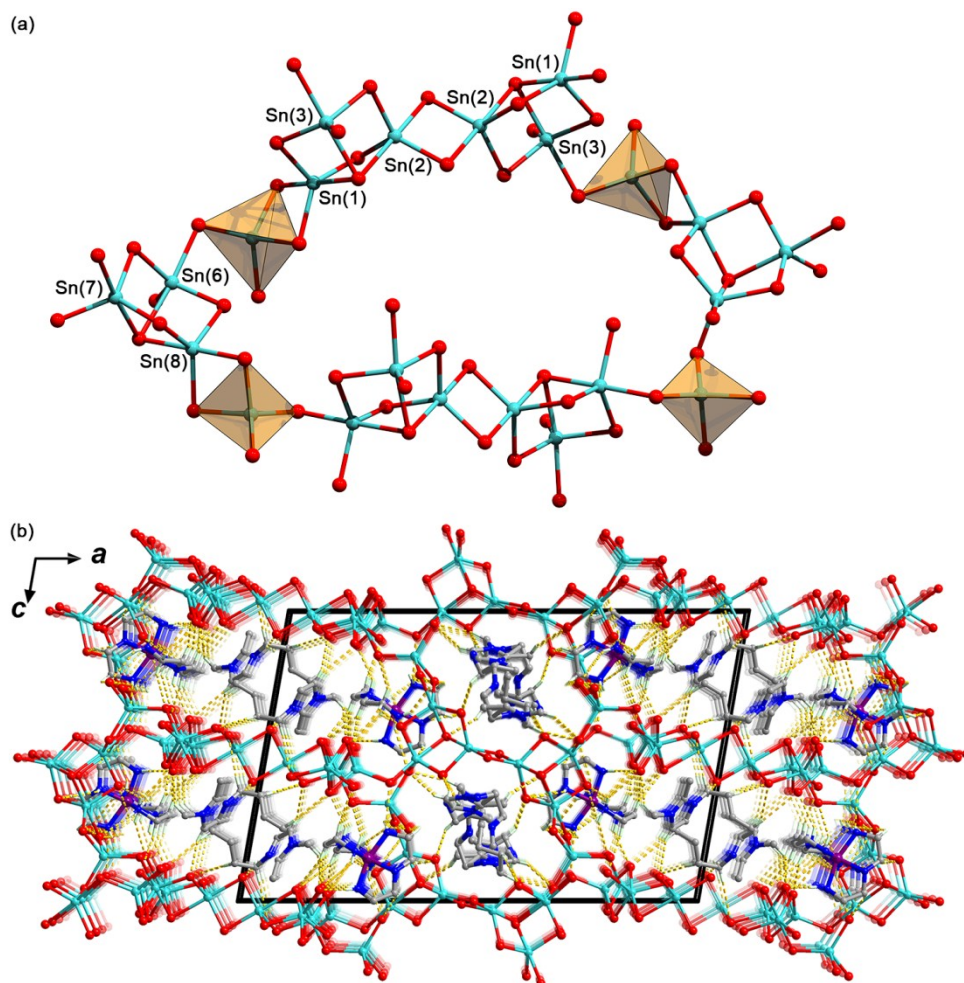

**Figure S2.** (a) The window of the large rectangular channel is defined by the interlinkages of  $[\text{Sn}_6\text{Se}_{18}]$  and  $[\text{SnSe}_4]$  units. (b) A perspective view along the  $b$ -axis of the packing diagram of **2** showing the intensive hydrogen bonds among cations and anionic  $[\text{Sn}_4\text{Se}_9]_n^{2n-}$  framework of **2**. Some of the hydrogen atoms on MACs and  $[\text{Bmmim}]^+$  cations are omitted for clarity.

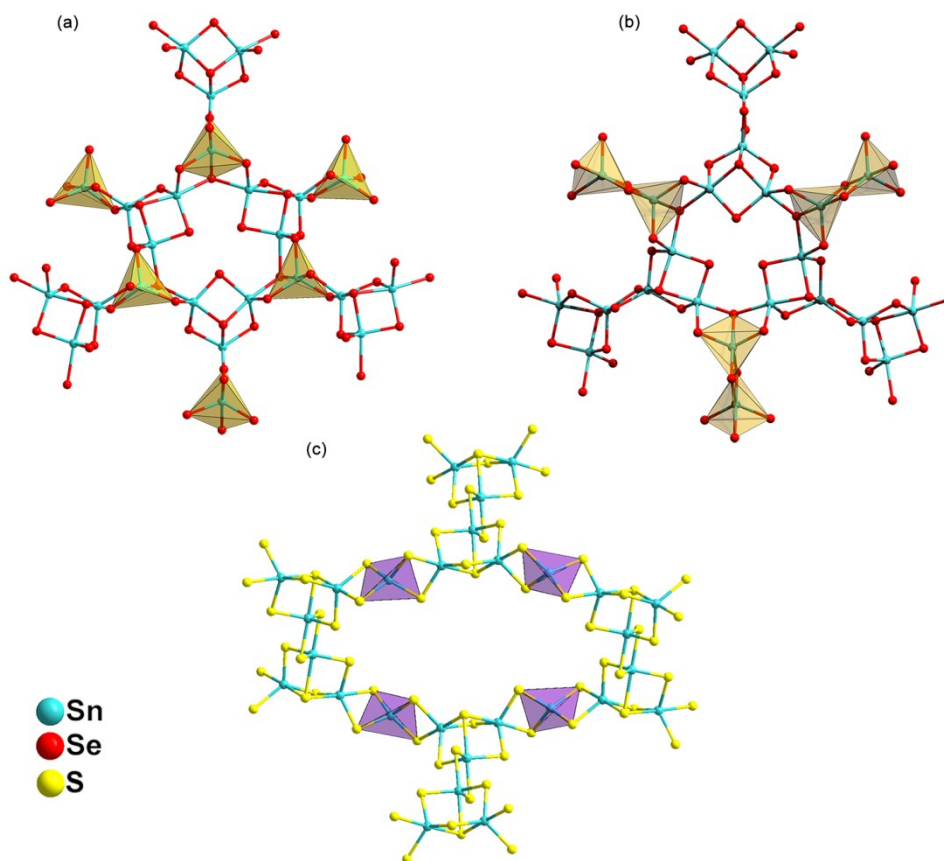

**Figure S3.** (a) Linkages of  $[\text{Sn}_3\text{Se}_{10}]$  and  $[\text{SnSe}_5]$  in  $3\text{D}-[\text{Fe}(\text{bipy})_3]\text{Sn}_4\text{Se}_9 \cdot 2\text{H}_2\text{O}$ .  $[\text{SnSe}_5]$  units were drawn in polyhedra. (b) Linkages of dimeric  $[\text{Sn}_6\text{Se}_{18}]$  and  $[\text{Sn}_2\text{Se}_8]$  in  $3\text{D}-(\text{Bmmim})_2[\text{Ni}(1,2\text{-pda})_3][\text{Sn}_4\text{Se}_9]_2$ .  $[\text{Sn}_2\text{Se}_8]$  units were drawn in polyhedra. (c) Linkages of dimeric  $[\text{Sn}_6\text{S}_{18}]$  SBUs and  $[\text{SnS}_4]$  tetrahedra in  $2\text{D}-[\text{Sn}_4\text{S}_9]_n^{2n-}$ .  $[\text{SnS}_4]$  units were drawn in polyhedra.

**Table S1.** Hydrogen bonds [ $\text{\AA}$  and  $^\circ$ ] for **1**.

| D-H $\cdots$ A                | $d(\text{H}\cdots\text{A})$ | $d(\text{D}\cdots\text{A})$ | $\angle(\text{D}-\text{H}\cdots\text{A})$ |
|-------------------------------|-----------------------------|-----------------------------|-------------------------------------------|
| N(1)-H(1A) $\cdots$ Se(4)#1   | 3.14                        | 3.903(5)                    | 142.3                                     |
| N(1)-H(1B) $\cdots$ Se(6)     | 2.69                        | 3.489(5)                    | 146.7                                     |
| N(2)-H(2A) $\cdots$ Se(5)#2   | 2.76                        | 3.572(5)                    | 149.8                                     |
| N(2)-H(2B) $\cdots$ Se(5)#3   | 2.7                         | 3.606(5)                    | 177.9                                     |
| N(3)-H(3C) $\cdots$ Se(2)#4   | 2.78                        | 3.625(5)                    | 154.5                                     |
| N(3)-H(3H) $\cdots$ Se(11)    | 3                           | 3.801(5)                    | 147.1                                     |
| N(3)-H(3C) $\cdots$ Se(2)#4   | 2.78                        | 3.625(5)                    | 154.5                                     |
| N(3)-H(3G) $\cdots$ Se(6)     | 2.91                        | 3.521(5)                    | 125.9                                     |
| N(3)-H(3H) $\cdots$ Se(11)    | 3                           | 3.801(5)                    | 147.1                                     |
| N(5)-H(5C) $\cdots$ Se(2)#3   | 2.63                        | 3.530(5)                    | 149.4                                     |
| N(5)-H(5D) $\cdots$ Se(5)#3   | 2.98                        | 3.772(5)                    | 137.1                                     |
| N(5)-H(5C) $\cdots$ Se(2)#3   | 2.63                        | 3.530(5)                    | 149.4                                     |
| N(5)-H(5D) $\cdots$ Se(5)#3   | 2.98                        | 3.772(5)                    | 137.1                                     |
| N(6)-H(6D) $\cdots$ Se(8)     | 2.84                        | 3.741(7)                    | 170.6                                     |
| C(1)-H(1D) $\cdots$ Se(2)#3   | 3.02                        | 3.920(7)                    | 151.3                                     |
| C(3)-H(3A) $\cdots$ Se(11)    | 2.89                        | 3.655(18)                   | 134.5                                     |
| C(4)-H(4A) $\cdots$ Se(5)#2   | 2.72                        | 3.683(16)                   | 165.6                                     |
| C(4)-H(4B) $\cdots$ Se(3)#2   | 3.13                        | 3.810(14)                   | 127.3                                     |
| C(6)-H(6A) $\cdots$ Se(1)#5   | 3.15                        | 3.623(16)                   | 110.6                                     |
| C(6)-H(6A) $\cdots$ Se(5)#3   | 2.82                        | 3.661(18)                   | 142.7                                     |
| C(6)-H(6A) $\cdots$ Se(1)#5   | 3.15                        | 3.623(16)                   | 110.6                                     |
| C(6)-H(6B) $\cdots$ Se(7)#5   | 3.16                        | 4.098(16)                   | 158.9                                     |
| C(7)-H(7A) $\cdots$ Se(11)#5  | 3.15                        | 3.893(15)                   | 132.9                                     |
| C(7)-H(7B) $\cdots$ Se(2)#3   | 3.08                        | 3.761(19)                   | 127                                       |
| N(4B)-H(4B1) $\cdots$ Se(5)#2 | 2.94                        | 3.930(14)                   | 171                                       |
| C(3B)-H(3F) $\cdots$ Se(2)#4  | 2.95                        | 3.619(12)                   | 125.7                                     |
| C(4B)-H(4F) $\cdots$ Se(1B)   | 2.42                        | 3.365(14)                   | 160                                       |

|                          |      |           |       |
|--------------------------|------|-----------|-------|
| C(6B)-H(6E)···Se(1)#5    | 2.84 | 3.685(14) | 144.3 |
| C(10)-H(10A)···Se(13)#6  | 2.9  | 3.84(4)   | 173.4 |
| C(12)-H(12B)···Se(7)     | 2.98 | 3.46(3)   | 111   |
| C(12)-H(12B)···Se(10)    | 2.94 | 3.86(2)   | 157.1 |
| C(13)-H(13B)···Se(13)    | 2.97 | 3.73(3)   | 135.6 |
| C(19)-H(19A)···Se(4)#1   | 2.92 | 3.79(3)   | 153.2 |
| C(21)-H(21A)···Se(3)     | 3.02 | 3.94(4)   | 156.4 |
| C(21)-H(21B)···Se(14)#7  | 3.16 | 4.01(4)   | 145.9 |
| C(24)-H(24A)···Se(14)#5  | 3.25 | 4.22(4)   | 166.2 |
| C(19B)-H(19B)···Se(13)#8 | 3.15 | 3.84(3)   | 130.5 |
| C(21B)-H(21E)···Se(1B)#7 | 3.05 | 3.80(3)   | 134.3 |
| C(22B)-H(22F)···Se(8)    | 2.79 | 3.46(3)   | 126   |

Symmetry codes: #1  $x, -y+3/2, z+1/2$ ; #2  $x, y-1, z$ ; #3  $-x, -y+1, -z+1$ ; #4  $-x, y-1/2, -z+1/2$ ; #5  $x, -y+1/2, z+1/2$ ; #6  $-x+1, y-1/2, -z+1/2$ ; #7  $x, y+1, z$ ; #8  $-x+1, -y+1, -z+1$

**Table S2.** Hydrogen bonds [ $\text{\AA}$  and  $^\circ$ ] for **2**.

| D-H···A                 | $d(\text{H}\cdots\text{A})$ | $d(\text{D}\cdots\text{A})$ | $\angle(\text{D}-\text{H}\cdots\text{A})$ |
|-------------------------|-----------------------------|-----------------------------|-------------------------------------------|
| N(1)-H(1D)···Se(5)      | 2.77                        | 3.644(9)                    | 162.4                                     |
| N(2)-H(2C)···Se(17)#1   | 3.14                        | 3.860(9)                    | 130.3                                     |
| N(3)-H(3C)···Se(10)#2   | 3.15                        | 3.717(9)                    | 122.8                                     |
| N(3)-H(3D)···Se(11)#3   | 2.89                        | 3.630(9)                    | 139.4                                     |
| N(3)-H(3D)···Se(13)#3   | 3.02                        | 3.606(8)                    | 124.1                                     |
| N(4)-H(4C)···Se(12)     | 2.99                        | 3.823(8)                    | 153.7                                     |
| N(4)-H(4D)···Se(11)#3   | 2.87                        | 3.647(8)                    | 144.6                                     |
| N(5)-H(5C)···Se(4)#2    | 2.65                        | 3.492(8)                    | 141.9                                     |
| N(6)-H(6C)···Se(10)#2   | 2.59                        | 3.499(9)                    | 172.6                                     |
| N(6)-H(6D)···Se(5)      | 2.85                        | 3.591(9)                    | 139.8                                     |
| N(6)-H(6D)···Se(16)#1   | 2.77                        | 3.362(9)                    | 123.9                                     |
| C(2)-H(2A)···Se(12)     | 2.91                        | 3.754(11)                   | 143.5                                     |
| C(3)-H(3A)···Se(17)#1   | 3.13                        | 3.765(11)                   | 122.9                                     |
| C(4)-H(4A)···Se(11)#3   | 3.12                        | 3.698(11)                   | 118.6                                     |
| C(4)-H(4B)···Se(10)#2   | 2.77                        | 3.604(11)                   | 142.6                                     |
| C(5)-H(5A)···Se(9)#3    | 2.77                        | 3.572(10)                   | 137.9                                     |
| C(5)-H(5B)···Se(8)      | 3.09                        | 3.679(11)                   | 119.2                                     |
| C(5)-H(5B)···Se(16)     | 2.9                         | 3.702(11)                   | 138.2                                     |
| C(6)-H(6A)···Se(1)      | 3.12                        | 3.983(10)                   | 147                                       |
| C(6)-H(6A)···Se(8)      | 2.89                        | 3.606(10)                   | 130.1                                     |
| C(7)-H(7B)···Se(1)      | 2.93                        | 3.820(11)                   | 149.5                                     |
| C(7)-H(7B)···Se(5)      | 3.16                        | 3.866(10)                   | 129.5                                     |
| C(8)-H(8B)···Se(3)#2    | 2.77                        | 3.723(9)                    | 161.9                                     |
| C(9)-H(9A)···Se(6)#2    | 3.1                         | 3.83(2)                     | 135.2                                     |
| C(12)-H(12B)···Se(5)    | 3.12                        | 3.894(18)                   | 136.9                                     |
| C(14)-H(14A)···Se(7)#4  | 3.1                         | 3.96(3)                     | 146.5                                     |
| C(14)-H(14B)···Se(2)    | 3.06                        | 3.98(2)                     | 154.9                                     |
| C(15)-H(15B)···Se(6)#4  | 3.12                        | 4.11(3)                     | 174.9                                     |
| N(11)-H(11A)···Se(15)#3 | 3.15                        | 3.83(6)                     | 135                                       |
| C(20)-H(20B)···Se(15)#3 | 2.58                        | 3.56(8)                     | 175                                       |
| C(21)-H(21B)···Se(17)#1 | 3.06                        | 3.57(4)                     | 113.8                                     |
| C(23)-H(23A)···Se(12)#5 | 3.1                         | 3.93(4)                     | 147.2                                     |
| C(26)-H(26B)···Se(14)   | 2.78                        | 3.72(6)                     | 159.5                                     |
| C(27)-H(27B)···Se(12)#5 | 2.72                        | 3.68(5)                     | 163.9                                     |
| C(28)-H(28B)···Se(15)#5 | 2.96                        | 3.91(4)                     | 159.5                                     |

Symmetry codes: #1  $x, y-1, z$ ; #2  $x, -y+1/2, z-1/2$ ; #3  $x, -y+3/2, z-1/2$ ; #4  $-x, -y+1, -z+1$ ; #5  $-x+1, -y+1, -z+1$

## 2. Physical measurements

### 2a) PXRD

All the crystalline samples were manually selected and used for PXRD characterizations. The PXRD patterns of compounds **1** and **2** match well with those simulated from single-crystal X-ray data, indicating the phase purity of the two compounds.

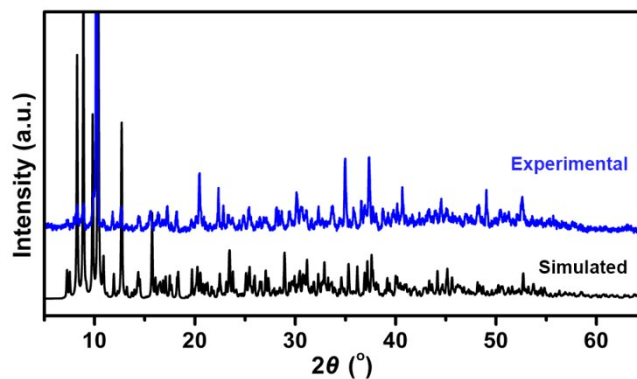

**Figure S4.** PXRD pattern of compound **1** and the simulated one from single-crystal X-ray structure.

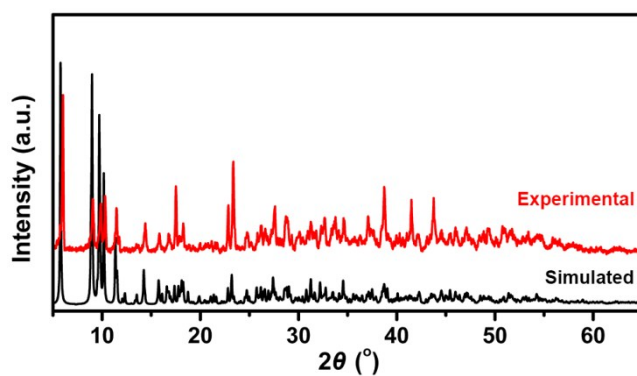

**Figure S5.** PXRD pattern of compound **2** and the simulated one from single-crystal X-ray structure.

The post-TGA residues for the two compounds were characterized by PXRD. The residues are a mixture of SnSe<sub>2</sub> (PDF NO. 89-3197, red lines), SnSe (PDF NO. 48-1224, pink lines) and Ni<sub>3</sub>Se<sub>4</sub> (PDF NO. 89-7162, blue lines) for **1** and a mixture of SnSe<sub>2</sub> (PDF NO. 89-3197, red lines), SnSe (PDF NO. 48-1224, pink lines) and NiSe<sub>2</sub> (PDF NO. 88-1711, green lines) for **2**, respectively.

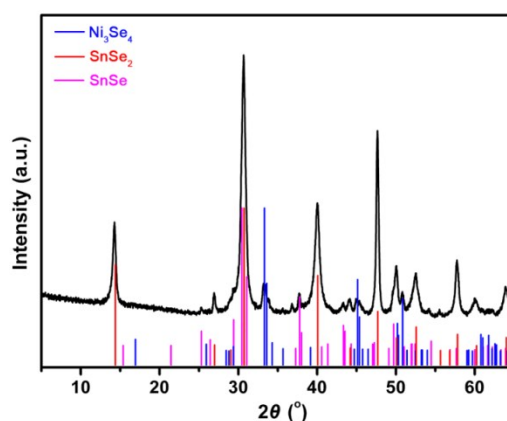

**Figure S6.** PXRD pattern of the post-TGA residue of compound **1** compared to that of the binaries.

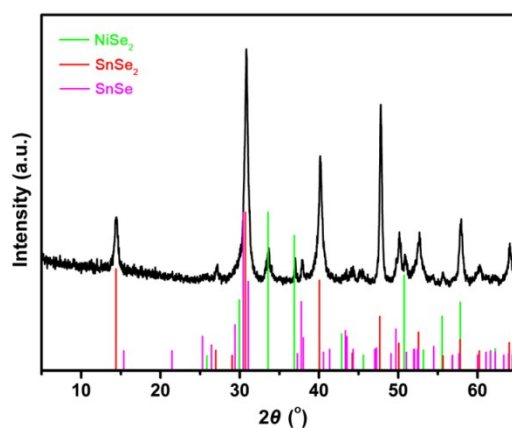

**Figure S7.** PXRD pattern of the post-TGA residue of compound **2** compared to that of the binaries.

## 2b) EDX spectra

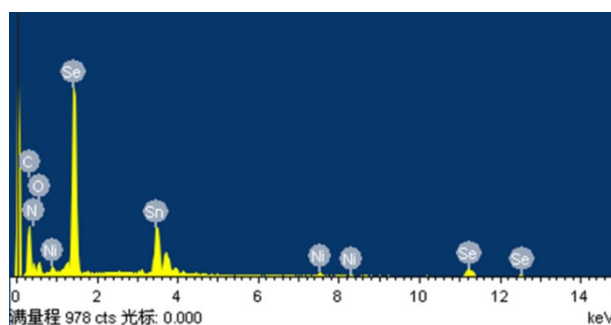

**Figure S8.** EDX spectrum of compound **1**.

**Table S3.** Atomic percentages from EDX analyses for compound **1**.

| Elements | Atomic percentages from EDX analysis | Theoretical molar ratio of elements (Ni: Sn: Se) | Experimental molar ratio of elements (Ni: Sn: Se) |
|----------|--------------------------------------|--------------------------------------------------|---------------------------------------------------|
| Ni K     | 0.46                                 |                                                  |                                                   |
| Sn L     | 2.89                                 | 1: 6: 14                                         | 1: 6.28: 16.13                                    |
| Se L     | 7.42                                 |                                                  |                                                   |

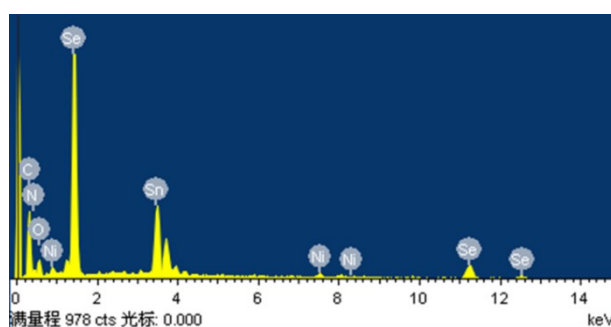

**Figure S9.** EDX spectrum of compound **2**.

**Table S4.** Atomic percentages from EDX analyses for compound **2**.

| Elements | Atomic percentages from EDX analysis | Theoretical molar ratio of elements (Ni: Sn: Se) | Experimental molar ratio of elements (Ni: Sn: Se) |
|----------|--------------------------------------|--------------------------------------------------|---------------------------------------------------|
| Ni K     | 0.86                                 |                                                  |                                                   |
| Sn L     | 7.12                                 | 1: 8: 18                                         | 1: 8.28: 20.38                                    |
| Se L     | 17.53                                |                                                  |                                                   |
